# Supplementary figures and images for: Parallel pathways for sound processing and functional connectivity among layer 5 and 6 auditory corticofugal neurons
Source: eLife journal article supplement (doi:10.7554/elife.42974), 2019-02-08

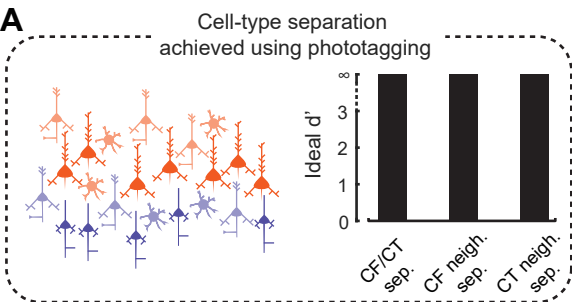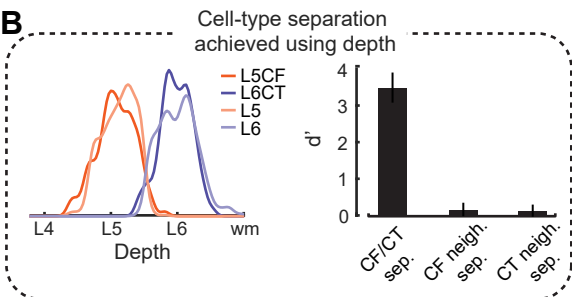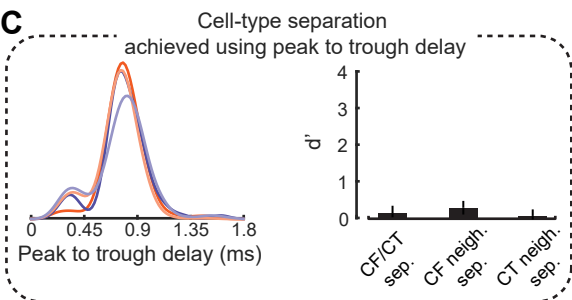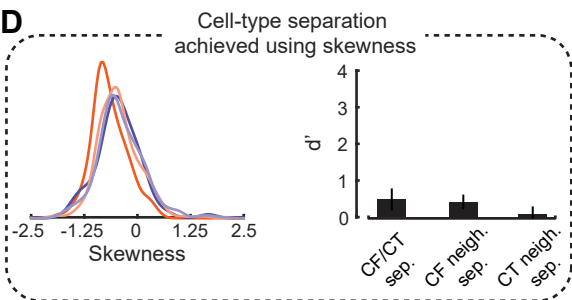

Supplement: supp [file elife-42974-supp-v1.zip]

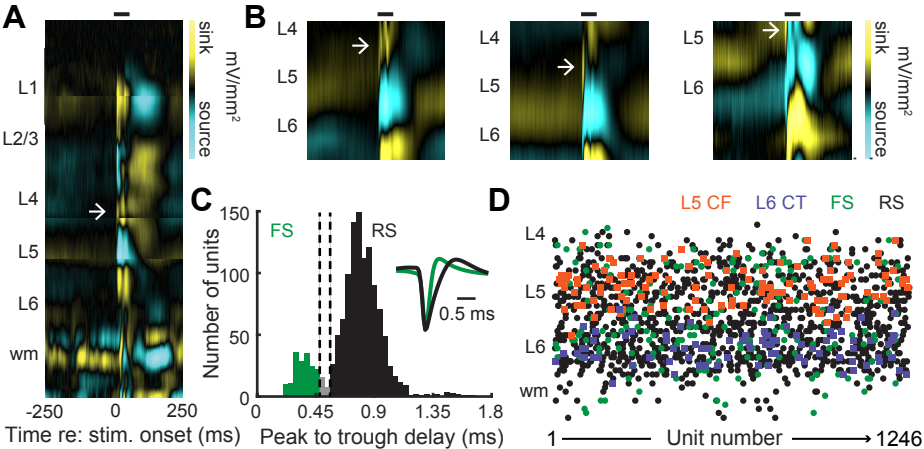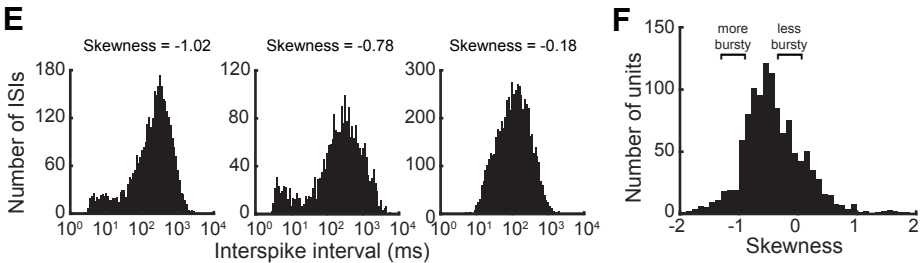

Supplement: supp [file elife-42974-supp-v1.zip]

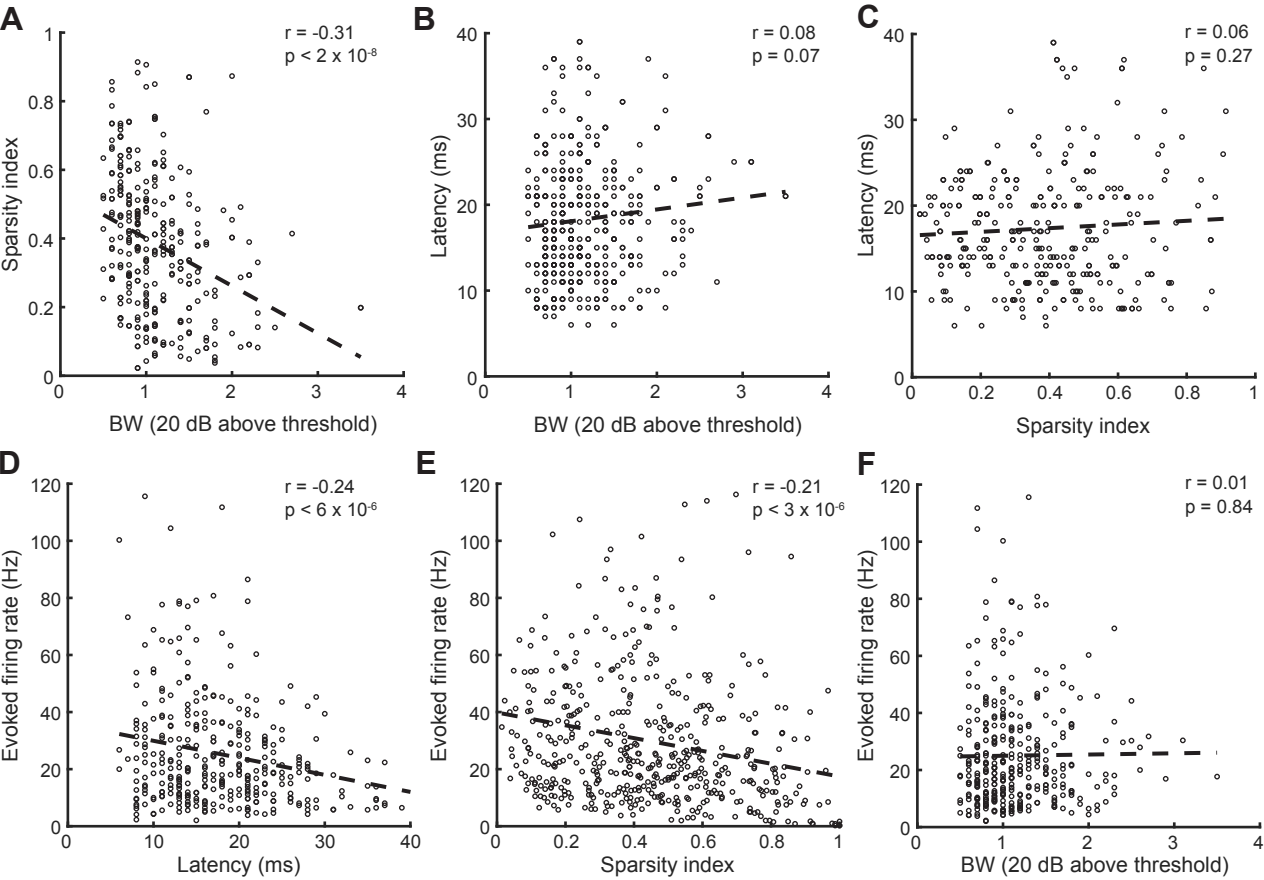

Supplement: supp [file elife-42974-supp-v1.zip]

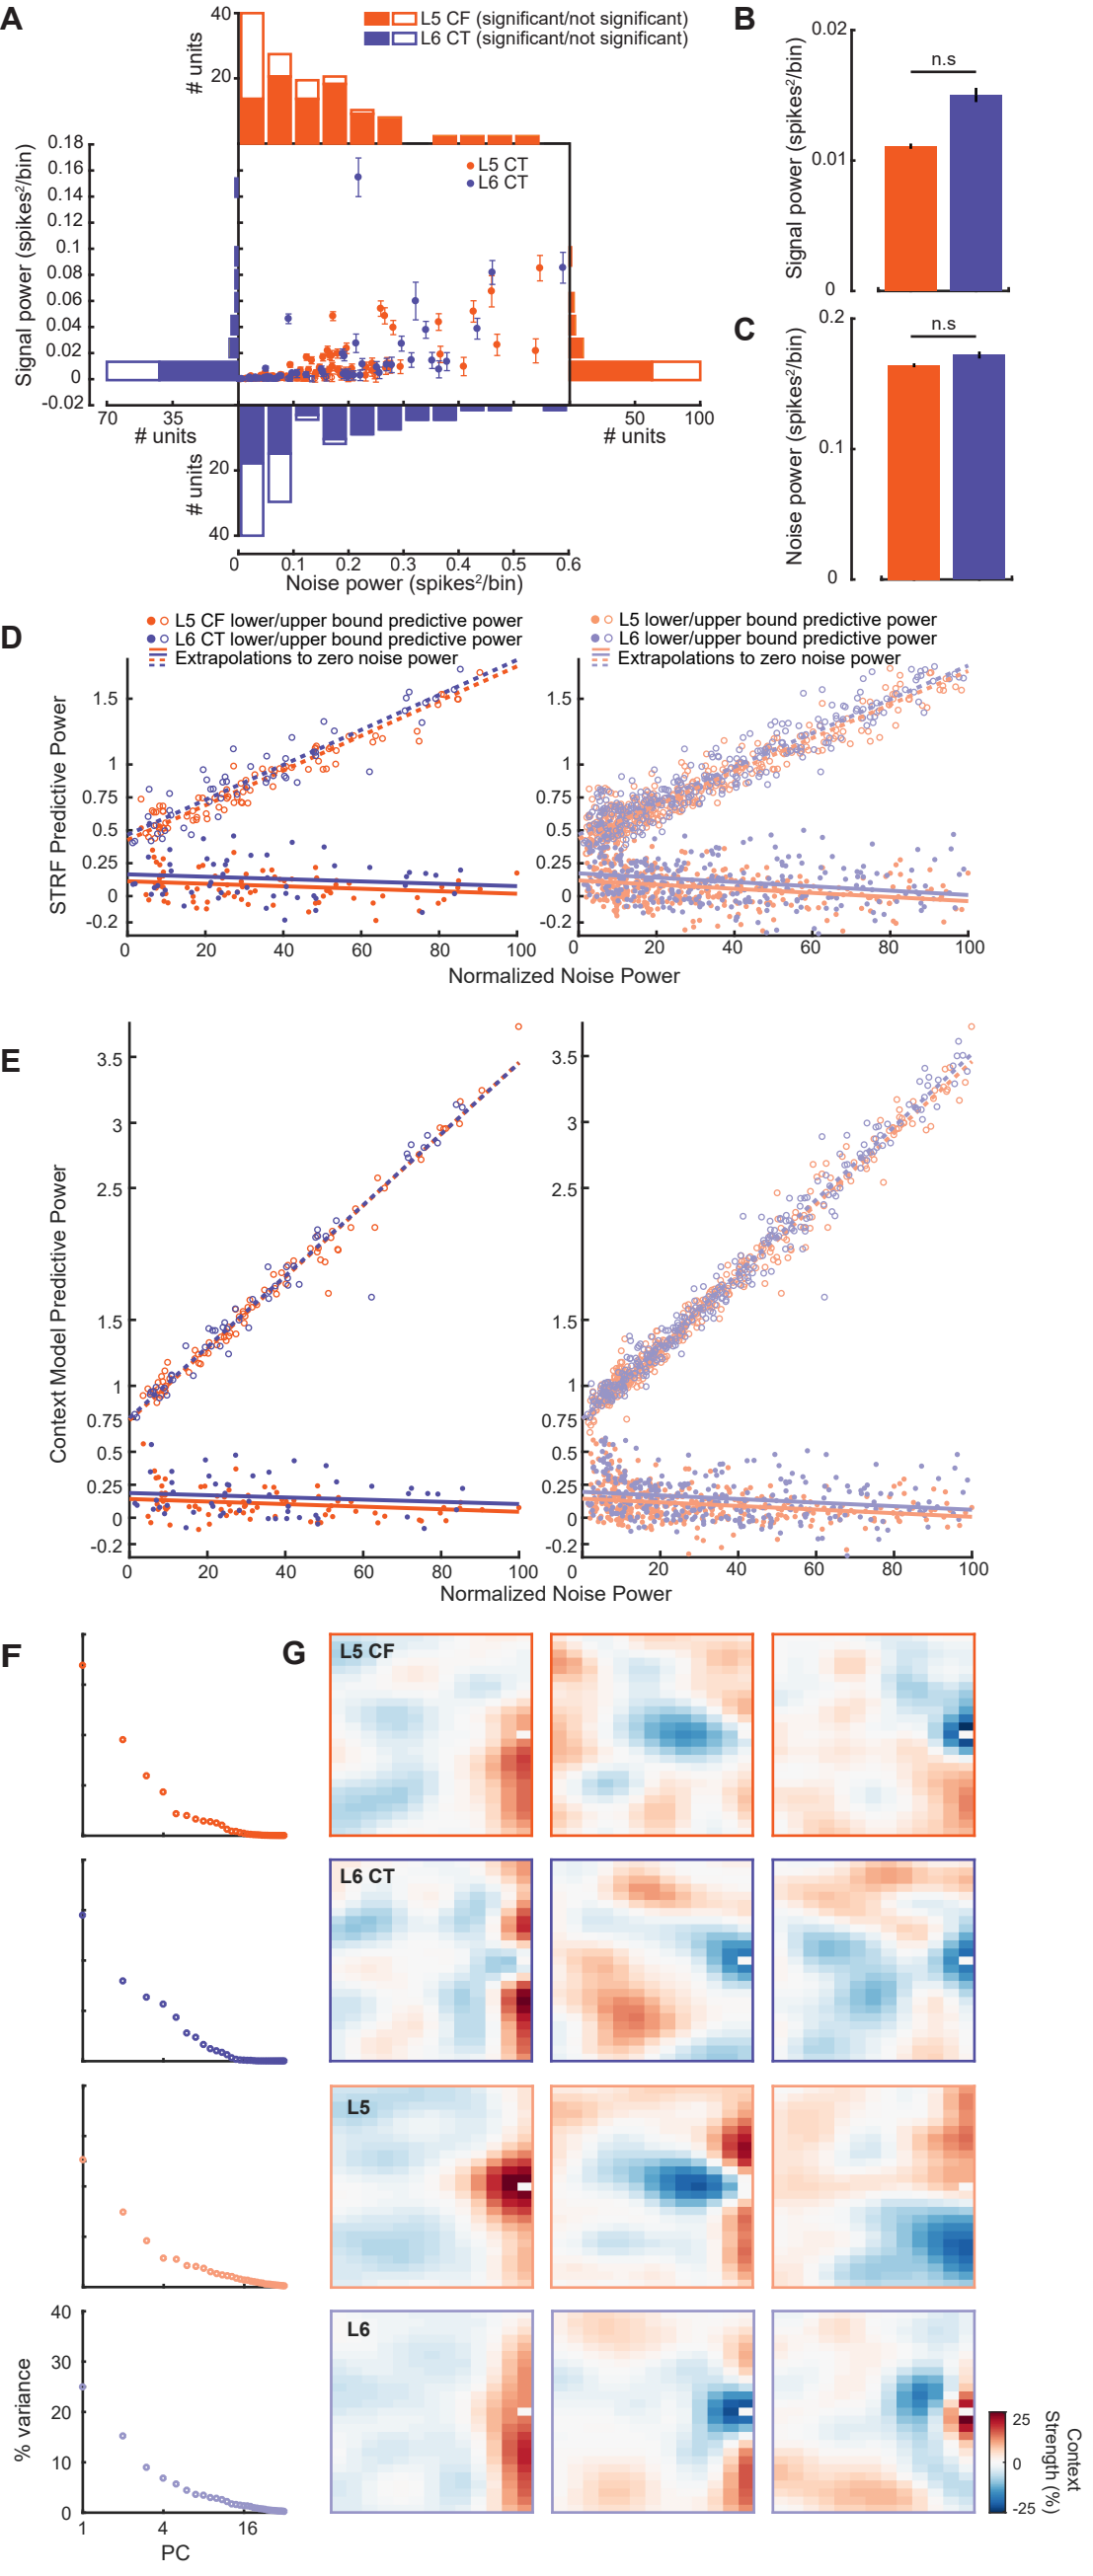

Supplement: supp [file elife-42974-supp-v1.zip]
